# 1 **Anatomy of the Heart with the Highest Heart Rate**

2 Short title: shrew heart anatomy

3

4 Yun Hee Chang<sup>1</sup>, Boris I. Sheftel (ORCID ID – 0000-0003-3808-8389)<sup>2</sup>, Bjarke Jensen  
5 (ORCID ID – 0000-0002-7750-8035)<sup>1,\*</sup>

6 <sup>1</sup>Department of Medical Biology, University of Amsterdam, Amsterdam, Cardiovascular  
7 Sciences, Amsterdam UMC, Meibergdreef 15, 1105AZ, Amsterdam, The Netherlands.

8 <sup>2</sup>A.N. Severtsov Institute of Ecology and Evolution RAS (Russian Academy of Sciences).  
9 Leninsky prospect 33, Moscow, 119071, Russian Federation.

10

11 \*Corresponding author; [b.jensen@amsterdamumc.nl](mailto:b.jensen@amsterdamumc.nl)

12

13 Keywords: evolution, development, cardiac conduction system, trabeculation, pulmonary veins

14 **ABSTRACT**

15 Shrews occupy the lower extreme of the seven orders of magnitude mammals range in size.  
16 Their hearts are large relative to body weight and heart rate can exceed a thousand beats a  
17 minute. To investigate whether cardiac traits that are typical mammalian scale to these  
18 extremes, we assessed the heart of three species of shrew (genus *Sorex*) following the sequential  
19 segmental analysis developed for human hearts. Using micro-computed tomography we  
20 describe the overall structure and find, in agreement with previous studies, a large and elongate  
21 ventricle. The atrial and ventricular septums and the atrioventricular and arterial valves are  
22 typically mammalian. The ventricular walls comprise mostly compact myocardium and  
23 especially the right ventricle has few trabeculations on the luminal side. A developmental  
24 process of compaction is thought to reduce trabeculations in mammals, but in embryonic shrews  
25 the volume of trabeculations increase for every gestational stage, only slower than the compact  
26 volume. By expression of *Hcn4*, we identify a sinus node and an atrioventricular conduction  
27 axis which is continuous with the ventricular septal crest. Outstanding traits include pulmonary  
28 venous sleeve myocardium that reaches farther into the lungs than in any other mammals.  
29 Typical proportions of coronary arteries-to-aorta do not scale and the shrew coronary arteries  
30 are proportionally enormous, presumably to avoid the high resistance to blood flow of narrow  
31 vessels. In conclusion, most cardiac traits do scale to the miniscule shrews. The shrew heart,  
32 nevertheless, stands out by its relative size, elongation, proportionally large coronary vessels,  
33 and extent of pulmonary venous myocardium.

## 34 INTRODUCTION

35 Shrews are eutherian insectivore mammals that can be tiny. Adult Eurasian least shrew (*Sorex*  
36 *minutissimus*) and Eurasian pygmy shrews (*Sorex minutus*), which we study in this report, only  
37 weigh a few gram. They therefore occupy the lower extreme of the seven orders of magnitude  
38 that mammals range in size. Because not much is known of their cardiac anatomy (Vornanen,  
39 1989, Rowlatt, 1990), it is not clear whether typical traits of mammal hearts scale to such  
40 miniscule sizes. Valves and chamber wall thicknesses would be predicted to scale linearly to  
41 cavity size according to the law of Laplace (Seymour and Blaylock, 2000, Jensen 2021) and  
42 typical proportions of valves, walls, and cavities might well scale to shrews. In contrast,  
43 resistance to blood flow is inversely related to vessel diameter raised to the power of four  
44 according to the Hagen-Poiseuille equation and very small arteries and veins in the shrew may  
45 impose high resistance.

46 Blood perfusion constantly must be critical in shrews since with the tiny body size also  
47 comes with the highest rates of mass specific metabolism among mammals which has to be  
48 supported by the greatest mass specific cardiac outputs, or volume of blood per gram tissue  
49 pumped per minute (Morrison et al., 1959, Jurgens et al., 1996). Whereas in human it takes one  
50 minute to circulate the entire blood volume, in a shrew it takes a few seconds (Schmidt-Nielsen,  
51 1984). A key component of the prodigious circulation is the incredibly fast heart rate, which  
52 may exceed a thousand beats a minute in the smaller shrew species (Morrison et al., 1959,  
53 Nagel, 1986, Vornanen, 1992, Jurgens et al., 1996). In many mammals, a well-developed  
54 cardiac conduction system initiates in its sinus node the cardiac impulse that, after a slow  
55 propagation through the atrioventricular node, rapidly spreads throughout the ventricles via the  
56 His bundle, bundle branches and Purkinje fibers (Davies, 1942, Dobrzynski et al., 2013). It is  
57 not known whether shrews have a typical conduction system, or an excessive one which could  
58 be expected given the extreme heart rates. An additional component in achieving great cardiac

59 output is likely a relatively large stroke volume because heart mass is substantially greater in  
60 shrews than in most other mammals (Pucek, 1965, Bartels et al., 1979, Vornanen, 1989).

61       There is no consensus on how to analyze the gross anatomy of a mammal heart while it  
62 is a common approach to describe structures in the same order as blood flows through the heart  
63 (Kareinen et al., 2020, Marais and Crole). One similarly ordered and broadly used approach for  
64 human hearts is the sequential segmental analysis which is sufficiently versatile to be applicable  
65 to crocodile hearts (Cook et al., 2017). Here we followed this manner of analysis. Our  
66 specimens were caught in the wild, in fall traps in Siberia, Russia. By coincidence, a few of the  
67 trapped shrews were pregnant females. From the embryos of these, we could study the  
68 development of the ventricular walls. Early cardiogenesis has been described for the house  
69 shrew and demonstrates the presence of highly trabeculated ventricles (Yasui, 1992, Yasui,  
70 1993), while anatomical studies on adult animals of the closely related moles of the genus *Talpa*  
71 suggest the adult ventricle may only have few trabeculations (Rowlatt, 1990). Gestational  
72 changes to ventricular trabeculations have attracted much attention in the context of so-called  
73 ‘noncompaction’ cardiomyopathy (Chin et al., 1990, Del Monte-Nieto et al., 2018, D’Silva and  
74 Jensen, 2020). Focus has been on a process of ‘compaction’, whereby trabeculated muscle on  
75 the luminal side of the ventricle is added to the compact wall (Sedmera et al., 2000). There is  
76 very little quantitative evidence, however, for such a process (Rychterova, 1971, Faber et al.,  
77 2021b). Instead, there is much stronger quantitative support for that the trabecular and compact  
78 layers can grow at different rates and when they do it changes the proportion of trabecular-to-  
79 compact myocardium (Blausen et al., 1990, Faber et al., 2021a, Faber et al., 2021c). If the shrew  
80 ventricles undergo pronounced gestational changes to the trabeculated layer, they may be a  
81 good test case for the explanatory power of compaction versus differential growth rates.

82       The primary research question of this study is whether typically traits of mammal hearts  
83 scale to the miniscule size of shrews. While studying the shrews, we had the opportunity to

84 address the secondary questions of what is the state of their cardiac conduction system given  
85 the high heart rates and how do their ventricular walls develop.

86

## 87 **MATERIAL AND METHODS**

### 88 **Animals**

89 All animals were collected from near Yenisei Ecological Station of A.N. Severtsov Institute of  
90 Ecology and Evolution RAS, Turukhansk district of Krasnoyarsk region (N 62°17', E 89°02').  
91 The collection of animals and the manner of trapping them complied with the guidelines of the  
92 A.N. Severtsov Institute of Ecology and Evolution RAS. Briefly, animals were collected from  
93 water-filled fall traps, deskinning, and fixed in either 10% or 20% formalin for one day and then  
94 kept in 70% ethanol until further use. Of the Eurasian pygmy shrew (*Sorex minutus*), we used  
95 six heart-lung preparations for the description of the formed heart and two embryos from each  
96 of three pregnant females for the description of developing hearts (Table 1). In addition, we  
97 used heart-lung preparations of formed animals of two Eurasian least shrew (*Sorex*  
98 *minutissimus*) and two taiga shrew (*Sorex isodon*) (Table 1).

### 99 **Micro-computed tomography**

100 The three hearts that were investigated with micro-CT, two *Sorex minutus* and one *Sorex*  
101 *isodon*, were first stained for two days with Lugol's solution (1.75g I<sub>2</sub> and 2.50g KI, both from  
102 Fischer Scientific, dissolved in 100ml deionized water). The volume of Lugol's solution was at  
103 least 10 times that of the tissue and the solution was kept in the dark during the staining. The  
104 tissue was then immobilized by imbedding in an agar solution (1.3g per 100ml water).  
105 Subsequently they were scanned at isotropic 10 μm resolution using a Bruker, Skyscan 1272.

106 All shown images of micro-CT are of specimen 127 which had the best tissue-lumen contrast  
107 of the two *Sorex minutus* specimens.

## 108 Sectioning and Histology

109 The hearts that were investigated with histology were embedded in paraplast and cut in 10 or  
110 12  $\mu\text{m}$  sections in either the transverse or frontal plane (four-chamber view). Staining was with  
111 saturated picro-sirius red in which muscle becomes orange and collagen becomes red following  
112 2 min differentiation in 0.01M HCl. Imaging of the stained slides was done with a Leica  
113 DM5000 light microscope.

## 114 Immunohistochemistry

115 With fluorescent immunohistochemistry, we detected smooth muscle actin (SMA), cardiac  
116 troponin I (cTnI) and hyperpolarization activated cyclic nucleotide gated potassium channel 4  
117 (Hcn4) as well as nuclei using DAPI (Sigma-Aldrich, dilution 1:1000, D9542). For SMA we  
118 used the primary antibody RRID:AB\_476701 (Sigma-Aldrich, dilution 1:400) which was  
119 visualized by a fluorescently labeled secondary donkey anti-mouse antibody coupled to Alexa  
120 555 (Thermo Fisher Scientific, dilution 1:250, RRID:AB\_2536180). For cTnI we used the  
121 primary antibody RRID:AB\_154084 (Hytest, dilution 1:300) which was visualized by a  
122 fluorescently labeled secondary donkey anti-goat antibody coupled to Alexa 488 (Thermo  
123 Fisher Scientific, dilution 1:250, RRID:AB\_2762838). For Hcn4 we used the primary antibody  
124 RRID:AB\_2120042 (Millipore, dilution 1:200) which was visualized by a fluorescently labeled  
125 secondary donkey anti-rabbit antibody coupled to Alexa 647 (Thermo Fisher Scientific, dilution  
126 1:250, RRID:AB\_2536183). In addition, for identification of the sinus node we tested Isl1  
127 (RRID:AB\_2126323) and Shox2 (RRID:AB\_945451) but we never detected positive nuclei.  
128 We did not seek to clarify whether the absence of signal was due to absence of the protein or  
129 deterioration of the epitopes due to suboptimal tissue fixation and preservation. Slides were

130 viewed and photographed with a Leica DM6000B fluorescent microscope. For estimations of  
131 the volume of trabecular and compact myocardium in embryos, we stained for cTnI as above  
132 on one section of 10 $\mu$ m thickness per 100 $\mu$ m (9 sections for specimen 699; 8 sections for  
133 specimen 422; 14 sections for specimen 630).

## 134 Analyses and statistics

135 We imported to Amira (version 2020.2, ThermoFisher Scientific) the micro-CT image series  
136 (two specimens of formed heart and lungs, one embryo of each the three gestational ages) and  
137 the images used for estimation of ventricular trabecular and compact tissue volume (one embryo  
138 of each the three gestational ages). Concerning *Sorex minutissimus*, from the histological  
139 section series of the entire heart and lung preparation we imported to Amira every 25<sup>th</sup> section,  
140 in total 13 sections for specimen 368 and 14 sections for specimen 639. Structures of interest  
141 were then labelled and their volume was derived using the “Materials Statistics” tool. To  
142 measure cross-sectional areas of vessels we first used the Slice module to create an image plane  
143 perpendicular to the labelled vessel. That plane was then converted to a 8-bit label image. Using  
144 the module Label Analysis, the vessel area was measured. To measure distances of structures  
145 of the lungs we imported images to ImageJ (version IJ 1.46r) and used the straight line selection  
146 tool. We used a one-way ANOVA to test for differences in distance.

## 147 **RESULTS**

### 148 Heart position and orientation

149 The body mass differed between the three investigated species (Table 1) and so did the size of  
150 the heart. The hearts were proportionally large, their tissue volume comprised more than 0.7%  
151 of fresh body mass (Table 2) and this percentage would likely have been greater still if fresh  
152 hearts had been measured (Vornanen, 1989). Besides the difference in absolute size of the heart

153 between the species, there were no gross morphological differences between the hearts. The  
154 position of the shrew heart is much like in human (Fig. 1). Within the thoracic cavity, the heart  
155 is mostly on the left side, and immediately caudal to the heart is the diaphragm. The ventricles  
156 in particular are quite elongate and the rather pointy apex is made up of the apex of the left  
157 ventricle (LV) (Fig. 1A-D). There is no interventricular sulcus and the border between the left  
158 and right ventricle is subtle. The left atrium (LA) is the most cranial and dorsal chamber, the  
159 right atrium (RA) is the right-most chamber, and the right ventricle (RV) rests on the diaphragm  
160 and is the most caudal and ventral chamber (Fig. 1C). The LV is longer and narrower than the  
161 RV, with the length/breadth index of the left and right ventricle being 1.5 and 1.3, respectively  
162 (Fig. 1D-E). Three caval veins connect to the RA (Fig. 1F-G). Two pulmonary veins connect  
163 to the LA, of which the right pulmonary vein is wider as it is the confluence of the veins from  
164 each of the four lobes of the right lung (Fig. 1F,H).

165 The right side of the heart

#### 166 **Caval veins**

167 Three caval veins connect to the RA, namely the caudal caval vein (CCV), right cranial caval  
168 vein (RCCV), and the left cranial caval vein (LCCV) (Fig. 1F-G). The part of the LCCV that is  
169 most proximal to the RA could be considered the equivalent of the coronary sinus of the human  
170 heart as it receives the great cardiac veins, it lies in the left atrioventricular (AV) groove and  
171 opens into the vestibule of the RA (Fig. 1G). There is no bridging vein between the RCCV and  
172 the LCCV, while such vein can be found in human with persistent left superior caval vein (Kula  
173 et al., 2011). The cross-sectional area of the lumens of the caval veins is large and comprises  
174 more than 50% of the total cross-sectional area of the lumens of all great veins and arteries  
175 (Table 3). All three caval veins have myocardium extending to the pericardial reflection (Fig.  
176 2A-C), whereas in human there is hardly any myocardium in the inferior caval vein (Noheria



177 et al., 2013). The distal-most parts of the cranial veins were often not included in the excised  
178 preparations, but when they were we found venous valves cranial to the myocardial-venous  
179 boundary. Also, at the myocardial-venous boundary of the caudal caval vein we found a valve  
180 in all three species (Fig. 2D-E).

### 181 **The right atrium and atrial septum**

182 A very prominent pillar-shaped muscular ridge, the crista terminalis is found in the dorsolateral  
183 wall of the RA, where it divides the atrium into a dorsal smooth portion, or body, and a lateral  
184 trabeculated portion, or appendage (Fig. 3A). The trabeculations of the body are thin compared  
185 to the LA (see below) and, when compared to the human RA, the trabeculations are configured  
186 more as a network than parallel pectinate muscles. Also, in contrast to human, the body is bigger  
187 than the appendage (Fig. 3B). The trabeculation extends to the area immediately around the  
188 right AV valve and atrial septum, except for the area of the vestibule. There is a well-developed  
189 left leaflet of the sinuatrial valve, whereas the right leaflet is much less prominent (Fig. 3C).  
190 The atrial septum comprise a thick secondary atrial septum composed of predominantly  
191 myocardium and a thin primary septum, or flap valve, composed of some myocardium besides  
192 endocardium and connective tissue (Fig. 3D). The cranial aspect of the secondary septum,  
193 which in human is essentially a fold (Anderson et al., 2014), in the shrew also takes the  
194 appearance of a folding-in of the atrial roof albeit the sulcus is traversed by bits of myocardium.

### 195 **The right ventricle and pulmonary artery**

196 The right ventricle looks to wrap around the septal part of the left ventricle (Fig. 4A) as is  
197 typical in mammals. The atrioventricular valve is membranous and of connective tissue (Fig.  
198 4B). It comprises a large septal leaflet and a large parietal leaflet (Fig. 4C). A prominent cleft  
199 subdivides the parietal leaflet in a smaller dorsal part and a large ventral part (Fig. 4C). The  
200 septal surface has a mostly smooth surface. Consequently, the appearance of the papillary

201 muscles and chordae tendineae is very subtle (Fig. 4A). Most the luminal side of the ventricular  
202 wall in fact has a smooth, or a-trabecular, appearance including the outflow tract. At the  
203 transition from septum to wall, however, there are well-developed trabeculations (Fig. 4D).  
204 Also, a fairly prominent trabecula septo-marginalis was found in the typical mammalian  
205 position (ventro-apically) and it hosted a proportionally quite large coronary artery (Fig. 4E).  
206 There are three cusps to the pulmonary arterial valve. As in human, these hinge in ventricular  
207 myocardium that forms a myocardial turret around the base of the pulmonary artery (Fig. 4F).

208         The main trunk of the pulmonary artery is short and it bifurcates into one branch to each  
209 lung (Fig. 5). Just as the right lung is bigger than the left, the right branch of the pulmonary  
210 artery is bigger than the left. The right branch lies between the ascending and descending aorta  
211 and splits into 4 branches, one branch for each of the four lobes of the right lung (Fig. 5A-B).  
212 The smaller solitary left pulmonary artery has an angle of approximately 75° to the main trunk  
213 and goes into the left lung which has one lobe only (Fig. 5C-D). The aorta and the main trunk  
214 of the pulmonary artery are conduits for the same cardiac output and they have similar cross-  
215 sectional areas (Table 3).

## 216 **The ventricular septal structures**

217 A small membranous septum was found below between the base of the aorta and the crest of  
218 the myocardial ventricular septum. The right atrioventricular valve hinges onto the  
219 membranous septum and thereby divides into an atrioventricular component (it separates the  
220 cavities of the right atrium and the left ventricle) and an interventricular component (Fig. 6A).  
221 A substantially offset in the hinge-line for the tricuspid valve relative to the mitral valve hinge-  
222 line was not seen. The atrioventricular membranous septum occupies the base of the gap  
223 between the non-coronary and right coronary cusps of the aortic valve (Fig. 6B-C).

## 224 **Pulmonary veins**

225 The left-sided atrial body receives two very short stems of pulmonary veins, with the right stem  
226 coming from the first two lobes of the right lung and the left stem coming from the third and  
227 fourth lobe of the right lung together with the solitary vein of the left lung (Fig. 1F). The right  
228 stem passes between the entrance of the right cranial caval vein and caudal caval vein and left  
229 stem passes over the coronary sinus to reach the left atrium.

230 A remarkable feature of the shrew heart is the extent of the myocardial sleeves of the  
231 pulmonary veins (Fig. 7). In *S. minutissimus* and *S. minutus* these sleeves reach within 0.2 mm  
232 of the lung surface, even in the distal parts of the lungs (Fig. 7C-D). Measured as the distance  
233 to the lung surface, the pulmonary venous myocardium extends as far as the pulmonary arteries  
234 and the terminal parts of the alveolar ducts (Fig. 7C-D). Despite the great extent of the  
235 pulmonary venous myocardium, it only constitutes approximately 2% of total myocardial  
236 volume (Table 2).

### 237 **Left atrium**

238 The left atrium is situated dorso-cranially. It has a venous component (body), a trabeculated  
239 component (appendage), and a vestibule (Fig. 8). The body has the two orifices of the  
240 pulmonary veins. The appendage is proportionally large when compared to the human setting.  
241 It is clog-shaped and its junction with the body is relatively narrow (Fig. 1F). The pectinate  
242 muscles are much more extensive in the left atrial appendage than the right atrial appendage  
243 (Fig. 8). Even though the left atrium lacks the muscular bundle like crista terminalis in the right  
244 atrium, the junction between the appendage and body is well defined by the coarse trabeculation  
245 in the appendage (Fig. 8).

### 246 **Left ventricle and aorta**

247 The left atrioventricular valve has two leaflets and two papillary muscles (Fig. 9). From the  
248 valve margins, chordae tendineae connect to the ventral papillary muscle which emerges from

249 the ventricular septum and to the dorsal papillary muscle that emerges from the ventricular free  
250 wall (Fig. 9B-C). The papillary muscles and tension apparatus of the left ventricle are much  
251 more prominent than those of the right ventricle. With the exception of the septo-parietal  
252 trabeculation of the right ventricle, the trabeculations of the left ventricle are coarser than those  
253 of the right ventricle, and this setting therefore resembles that of pig but not that of human  
254 where the right ventricle has the coarser trabeculations (Crick et al., 1998). The left ventricular  
255 outflow tract is without trabeculations and the septal atrioventricular leaflet and fibrous  
256 continuity are also the part of the outflow tract (Figs. 6A, 9A).

257 There are three cusps to the aortic valve and each of the two coronary arteries arise from its  
258 own aortic sinus like in human (Fig. 9D-E). The left coronary artery has a proportionally very  
259 large diameter, approximately 1:2 when compared to that of the aorta, and this ratio in human  
260 would be much closer to 1:10 (Fig. 9F). Its actual diameter is only approximately 200 $\mu$ m,  
261 however, which is the diameter of an arteriole. The right coronary artery is almost as large as  
262 the left. Both coronary arteries immediately become intramural in their course through the  
263 ventricular mass and their main stems are in the parietal walls rather than at the boundary of the  
264 left and right ventricle. Consequently, the ventricular surface does not have large coronary  
265 vessels and an interventricular sulcus that demarcate the left and right ventricle as in human  
266 and pig (Crick et al., 1998).

267 The aorta and the pulmonary trunk have a spiral relationship (Fig. 9G-H). The aortic arch  
268 crosses cranially to the bifurcation of the pulmonary arteries (Fig. 5D). The ascending aorta is  
269 located to the right of the trunk of the pulmonary artery. The aortic arch gives rise to only two  
270 branches leading cranially. The descending aorta lies between the esophagus and left cranial  
271 caval vein (Fig. 5D).

## 272 **Development of ventricular trabeculation**

273 The smooth appearance of the ventricular walls, suggested that extensive compaction had taken  
274 place during development, where compaction can be defined as a reduction of the trabecular  
275 layer as trabeculations are added to the compact wall (Faber et al., 2021b). To detect compaction,  
276 we investigated the gestational change to the volumes of the trabecular and compact layers of  
277 both ventricles, in hearts that by outward appearance resembled hearts of mouse from  
278 gestational ages E10.5, E12.5, and E16.5 (de Boer et al., 2012). The shrew heart grows rapidly  
279 (Fig. 10A), as seen in developing human, mouse and chicken as well (Faber et al., 2021b). At  
280 all gestational ages, a very substantial layer of trabecular muscle was found in both ventricles  
281 (Fig. 10B). We invariably found that older specimens had a greater volume of trabecular muscle  
282 in each ventricle (Fig. 10C). The same findings were made for compact muscle, only the  
283 compact muscle increased in volume at a greater rate than the trabecular muscle (Fig. 10C).  
284 This difference in growth rate led to a decrease of the percentage of trabecular muscle (Fig.  
285 10D), even if the absolute volume of trabecular muscle increased over time. Such proportional  
286 change has been construed as ‘compaction’ but given the positive growth of the trabecular layer  
287 there is no quantitative support for the addition of trabeculations to the compact wall. In adult  
288 shrew, trabeculations had a much greater volume than in any developmental stage and the right  
289 ventricle had more trabeculation than the left ventricle (3.90 mm<sup>3</sup> and 1.32 mm<sup>3</sup> respectively).

## 290 **The cardiac conduction system**

291 Given the extremely high heart rates of shrews, it could be presumed that their hearts would  
292 contain a structurally pronounced conduction system. To investigate whether this was the case,  
293 we surveyed three histological series (Fig. 11A-B). A sinus node was found in the parietal and  
294 ventral junction of the right cranial caval vein and the right atrium (Fig. 11C). It was identifiable  
295 by being node-like in appearance, by being relatively rich in collagen and by a low expression  
296 of cardiac troponin I (Fig. 11D). In addition, Hcn4 which is a key marker of the conduction  
297 system (Boyett et al., 2021), was expressed in a subset of the myocardium with low expression

298 of troponin I (Fig. 11D) which is another characteristic of conduction tissue (Sizarov et al.,  
299 2011). This presumed sinus node was small, approximately 100 $\mu$ m wide and 500 $\mu$ m dorso-  
300 ventrally long in all three investigated specimens. Concerning the atrioventricular conduction  
301 axis, an insulating plane disrupted the atrioventricular myocardial continuity in the right and  
302 left atrioventricular junction (Fig. 11E-F). At the base of the atrial septum, there was  
303 myocardium which was relatively dispersed by collagen and which expressed Hcn4 and  
304 expressed relatively little troponin I (Fig. 11G). This myocardium therefore at the appearance  
305 of the penetrating bundle of His. Ventrally, this myocardium came into continuity with the  
306 myocardium of the ventricular septal crest (Fig. 11H). We did not identify structures that  
307 resembled the atrioventricular node or bundle branches, but many of the sections that could  
308 have contained these structures also had artefacts from blood and connective tissue that had  
309 come loose during the staining procedures.

## 310 **DISCUSSION**

311 The shrew heart is in most ways a typical mammal heart, despite being at the extreme lower  
312 end of the seven orders of magnitude that mammals range in size. Its exceptional traits can be  
313 summarized as its large relative size and great elongation, which has been reported before  
314 (Vornanen, 1989), and, as we show here, the extreme extent of the pulmonary venous  
315 myocardium. Sleeves of myocardium around the pulmonary veins are found in many mammals  
316 including human (Rowlatt, 1990). The sleeves are typically confined to the parts that are most  
317 proximal to the left atrium and they are thought to act as throttle valves of pulmonary venous  
318 return (Nathan and Gloobe, 1970). In the shrew, however, there is virtually no part of the  
319 pulmonary venous tree that is without a myocardial sleeve. It is therefore difficult to envision  
320 the role of throttle valve to this myocardium. In human, ectopic pacing of the atria often  
321 originates from the pulmonary venous myocardium and this setting requires pulmonary vein  
322 isolation by catheter-ablation. While electrocardiograms have been reported for shrews

323 (Morrison et al., 1959, Nagel, 1986, Vornanen, 1989, Jurgens et al., 1996), it is not known  
324 whether their extensive pulmonary venous myocardium associates with a propensity to develop  
325 atrial arrhythmias.

### 326 **Traits that shrews share with most mammals**

327 Shrews and most mammals have three caval veins, whereas the human setting of having a  
328 regressed left caval vein is less common (Rowlatt, 1990, Jensen et al., 2014a, Carmona et al.,  
329 2018). Compared to human, the caval vein myocardium is extensive, but many mammals have  
330 similarly extensive myocardium i.e. it extends to the vicinity of the pericardial border (Nathan  
331 and Gloobe, 1970, Jensen et al., 2014a). The number of pulmonary veins that connect to the left  
332 atrium is more variable in mammals than in other tetrapods (Kroneman et al., 2019) and two  
333 veins, as in shrews, is not uncommon (Rowlatt, 1990). The atrioventricular valves and tricuspid  
334 pulmonary and aortic valves of the shrews were typically of mammals (Rowlatt, 1990). In  
335 monotreme and marsupial mammals the right atrioventricular valve can be dominated by the  
336 parietal leaflet (Lankester, 1882, Runciman et al., 1992), but in the shrews the septal leaflet was  
337 well-developed as is common in eutherian mammals (Rowlatt, 1990). Eutherians are distinct  
338 from other mammals by having a second atrial septum which leaves a circular depression called  
339 the oval fossa on the right face of the atrial septum (Röse, 1890, Rowlatt, 1990, Jensen, 2019).  
340 The shrews also have an oval fossa and its dorso-cranial rim is provided by a fold in the atrial  
341 roof in a manner that much resembles the human setting (Anderson et al., 2014).

342         Given the extremely high heart rates of shrews, one could presume an unusual cardiac  
343 conduction system. The cardiac conduction has been identified on the basis of histological  
344 characters such as weak stain and richness in collagen (Davies, 1942, Ho et al., 2003) and on  
345 the presence of the funny current channel, Hcn4 (Sizarov et al., 2011, Boyett et al., 2021). We  
346 show in the shrew the presence of myocardium that is insulated by collagen and that expresses  
347 Hcn4 where a mammal sinus node and His bundle would be expected. A lot of our histology

348 was perturbed by loose and displaced connective tissue and blood, and this hampered the  
349 identification of the atrioventricular conduction axis in particular. We therefore suggest that the  
350 absence of a clear identification of an atrioventricular node and bundle branches in our data  
351 should not be seen as strong evidence for the absence of these structures. From the data we do  
352 have, we consider it unlikely that the shrew cardiac conduction system is excessively  
353 developed.

#### 354 **Unusual traits of the shrew heart**

355 A right ventricular wall and septum almost free of trabeculations is not typical of mammals but  
356 it is found in shrews, as we report here, and bats, squirrels, and mustelids (Rowlatt, 1990). It is  
357 invariable so that the ventricles of embryos are highly trabeculated (Jensen et al., 2016), which  
358 has also been documented in shrews (Yasui, 1993). So a proportional change must take place  
359 from the embryonic and highly trabeculated setting to the adult setting which is virtually free  
360 of trabeculations. Two different processes have been proposed to explain such proportional  
361 change. One is that the trabecular and compact layers grow throughout development, but the  
362 growth rate of the two layers may differ periodically which then changes the layer proportions  
363 (Faber et al., 2021a). In agreement with this view, our data show the compact layer has a greater  
364 rate of growth than the trabecular layer and this reduces the proportion of trabecular muscle  
365 during gestation. The other proposed process is compaction, whereby trabeculations are  
366 removed from the trabecular layer and added to the compact wall (Rychterova, 1971, Chin et  
367 al., 1990). No decrement of the trabecular layer thickness has been documented however (Faber  
368 et al., 2021b), even though this is a predicted outcome if compaction takes place. In this light,  
369 the shrew ventricles are an interesting test for the hypothesis of compaction, because their right  
370 ventricular wall is comparative very smooth. The developmental data, however, do not support  
371 a role of compaction but it do support a role of differential growth rates.

#### 372 **Unusual traits that may be ascribed to small size**



373 One unusual trait of the shrew hearts was the little amount of fibro-fatty tissue that comprised  
374 the insulating plane between the atria and ventricles. In the left atrioventricular junction, the  
375 insulation was so meagre that it was difficult to assess whether the atrial and ventricular  
376 myocardium was in fact insulated from each other. In larger animals, millimeters of connective  
377 tissue separate the atrial and ventricular myocardium (Ho et al., 2003). Another unusual trait  
378 was the extremely large size of the main branches of the coronary vessels, when these were  
379 seen in proportion to the diameter of the aorta and thickness of the ventricular wall. In absolute  
380 size, the diameter of the coronary vessels was of course small and it was within the range of  
381 arterioles. In large conduit vessels such as the human aorta, diameter has almost no impact on  
382 resistance to blood flow as given by the Hagen-Poiseuille equation, whereas in the size range  
383 of arterioles, diameter change has a very large impact on resistance. In this light, the proportions  
384 of aorta-to-coronary-arteries found in human, for example, may not scale to the small size of  
385 shrews, because it would reduce the diameter of the coronary arteries so much as to render them  
386 high-resistance vessels.

### 387 **Highly unusual traits of the shrew heart**

388 A very elongate ventricle is a highly unusual trait in a mammal and it is found in shrews  
389 (Vornanen, 1989) and the closely related moles of the genus *Talpa* (Rowlatt, 1968). Otherwise,  
390 elongate ventricles appear restricted to animals that are highly elongate themselves, such as  
391 snakes and caecilian amphibians (Ramaswami, 1944, Jensen et al., 2014b, de Bakker et al.,  
392 2015). Shrews and moles are not particularly elongate mammals and the significance of their  
393 highly unusual heart shape is not clear. The developing hearts that were investigated here, and  
394 previously (Yasui, 1993), were not much different in shape from developing mouse hearts and  
395 this suggests that the elongate shape develops late in gestation or even after birth.

396 Perhaps the most unusual morphological trait of the shrew heart is the extent of the  
397 pulmonary venous myocardium. It was previously demonstrated that pulmonary venous

398 myocardium is present in shrews (Endo et al., 1997) and mice, for example, have myocardial  
399 sleeves that extend three bifurcations up the pulmonary venous tree (Mommersteeg et al., 2007).  
400 To the best of our knowledge, however, our report is the first documentation of the extreme  
401 extent of the shrew pulmonary venous myocardium which much exceeds that of mouse. The  
402 extreme extent aside, the amount of muscle around the pulmonary veins is not much, it is just  
403 a few percent of the total cardiac mass. Therefore, even if cardiac muscle is energetically very  
404 demanding (Mootha et al., 1997), the pulmonary venous myocardium may not necessarily  
405 impose a large metabolic cost and its advantage to organismal performance may not have to be  
406 great.

407       Observations on valves in veins have a long history (Franklin, 1927), but to the best of  
408 our knowledge this is the first report of a valve on the myocardial-venous boundary in the caudal  
409 caval vein. Whales have a sphincter at the same position (Lillie et al., 2018), but not a valve of  
410 leaflets. Even in reptiles, where the caval vein myocardium functions as a chamber and a valve  
411 in the caudal caval vein would seem advantageous (Jensen et al., 2017, Joyce et al., 2020), there  
412 is no valve. Because such valve is rarely sought after and it may easily be obscured by  
413 coagulated blood or by its collapse against the vessel wall, a dedicated investigation may be  
414 required to establish whether a valve in the caudal caval vein is highly unusual among  
415 vertebrates.

## 416 **Conclusion**

417 In this study we investigated whether typically traits of mammal hearts scale to the size of  
418 shrews and for key anatomical traits, such as valves and septums, they do scale to the extremely  
419 small. Traits that do not scale may be the proportionally very large coronary arteries and the  
420 atrioventricular junction insulation, which comprise very little tissue. The pronounced  
421 elongation of the ventricle, the extreme extent of the pulmonary venous myocardial sleeves,  
422 and the valve in the caudal caval vein may set shrew hearts aside from other mammal hearts.

423 **ACKNOWLEDGMENTS**

424 The authors would like to thank for her assistance Antonina Yu. Alexandrova with the  
425 collection of shrews, Quinn Gunst and Corrie de Gier-de Vries for their assistance with  
426 histology and immunohistochemistry and Jaco Hagoort for his assistance with Amira. The  
427 authors have no conflict of interest to declare.

428 **AUTHOR CONTRIBUTION**

429 Conceptualization of the study was by BJ; acquisition of data and critical revision of the  
430 manuscript was by was by YHC, BIS, BJ; data analysis and interpretation, and drafting of the  
431 manuscript was by YHC and BJ.

432 **DATA AVAILABILITY STATEMENT**

433 The data that support the findings of this study are available from the corresponding author  
434 upon reasonable request.

435 **Table 1. Overview of the used specimens.**

| Specimen                  | Body mass (g) | Micro-CT  | IHC       | Picro-sirius red |
|---------------------------|---------------|-----------|-----------|------------------|
| <i>Sorex minutus</i>      |               |           |           |                  |
| 124 juvenile female       | 3,3           |           | yes       | yes              |
| 127 adult male            | 4,6           | yes       | yes       | yes              |
| 250 adult male            | 4,9           |           |           | yes              |
| 261 juvenile female       | 3,3           |           | yes       | yes              |
| 286 juvenile male         | 3,0           |           | yes       |                  |
| 630 adult female          | 6,1           | yes       |           |                  |
| Embryos                   |               |           |           |                  |
| 699 E10.5 (n=2)           |               | yes (n=1) | yes (n=1) |                  |
| 422 E12.5 (n=2)           |               | yes (n=1) | yes (n=1) |                  |
| 630 E16.5 (n=2)           |               | yes (n=1) | yes (n=1) |                  |
| <i>Sorex minutissimus</i> |               |           |           |                  |
| 368 subadult female       | 2,3           |           |           | yes              |
| 639 juvenile female       | 2,0           |           | yes       | yes              |
| <i>Sorex isodon</i>       |               |           |           |                  |
| 394 juvenile female       | 9,3           | yes       |           |                  |
| 395 juvenile male         | 9,7           |           |           | yes              |

436 Exx.x, embryonic day xx.x (based on likeness to mouse).

437 **Table 2. The volume of the heart and the pulmonary venous myocardium.**

| Specimen                  | Body mass (g) | Cardiac volume (mm <sup>3</sup> ) | Cardiac index (%) | PVM volume (mm <sup>3</sup> ) | PVM/cardiac volume (%) |
|---------------------------|---------------|-----------------------------------|-------------------|-------------------------------|------------------------|
| <i>Sorex minutus</i>      |               |                                   |                   |                               |                        |
| 286                       | 3.0           | 23.34                             | 0.78              | 0.488                         | 2.09                   |
| 261                       | 3.9           | 28.42                             | 0.73              | 0.360                         | 1.27                   |
| 127                       | 4.0           | 35.70                             | 0.78              | 1.163                         | 3.26                   |
| <i>Sorex minutissimus</i> |               |                                   |                   |                               |                        |
| 368                       | 2.3           | 16.02                             | 0.70              |                               |                        |
| 639                       | 2.0           | 15.92                             | 0.80              |                               |                        |

438 PVM, pulmonary venous myocardium.

439 **Table 3. The cross-sectional area of the great vessels.**

| Structure            | Cross-sectional area (μm <sup>3</sup> ) | Cross-sectional area (%) |
|----------------------|-----------------------------------------|--------------------------|
| Aorta                | 325                                     | 13.1                     |
| Caval veins          | 1292                                    | 52.2                     |
| <i>Caudal</i>        | 513                                     |                          |
| <i>Right cranial</i> | 458                                     |                          |
| <i>Left cranial</i>  | 321                                     |                          |
| Pulmonary artery     | 335                                     | 13.5                     |
| Pulmonary veins      | 521                                     | 21.1                     |

440

441

442 **Figure Legends**

Figure 1

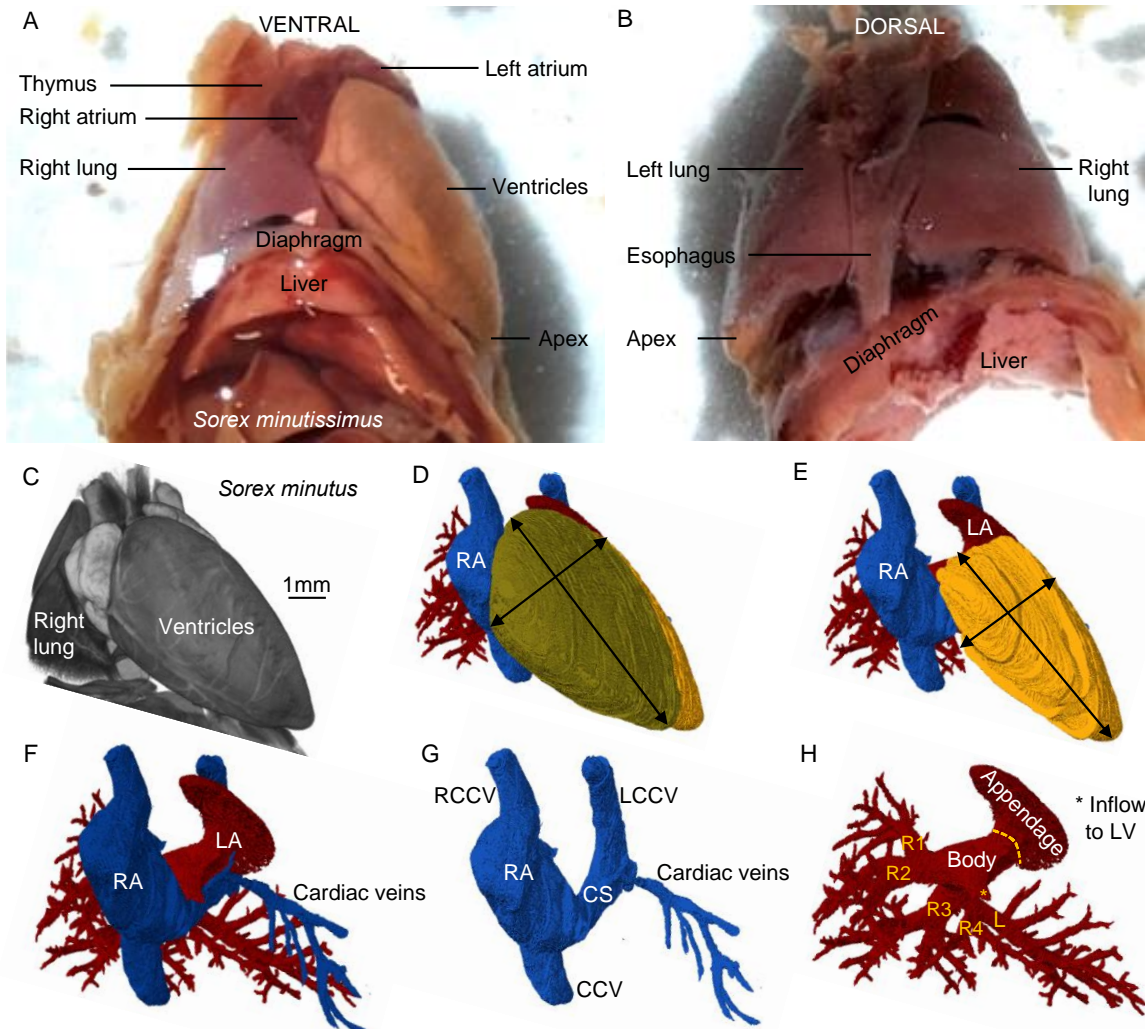

443

444 **Figure 1. Topology of the shrew heart. A-B.** Ventral (A) and dorsal (B) view of the heart of  
445 *Sorex minutissimus* (specimen 637). Notice the caudal-left position of the apex and the great  
446 elongation of the ventricle. **C.** Volume rendering of micro-CT of *Sorex minutus* (specimen 127),  
447 showing the heart in approximately its attitudinally correct position when viewed ventrally. **D.**  
448 The right atrium (RA) and right ventricle (RV) are the most ventral chambers. **E.** The left  
449 ventricle is very elongate. **F-G.** Three caval veins connect to the RA. **H.** The left atrium (LA)  
450 has a large appendage. It receives one stem into which drains veins from the first two lobes of

451 the right lung (R1-R2) and a second stem into which drains veins from the last two lobes of the  
452 right lung (R3-R4) and the left lung (L). CCV, caudal caval vein; CS, coronary sinus; L(R)CCV,  
453 left (right) cranial caval vein.

454

Figure 2

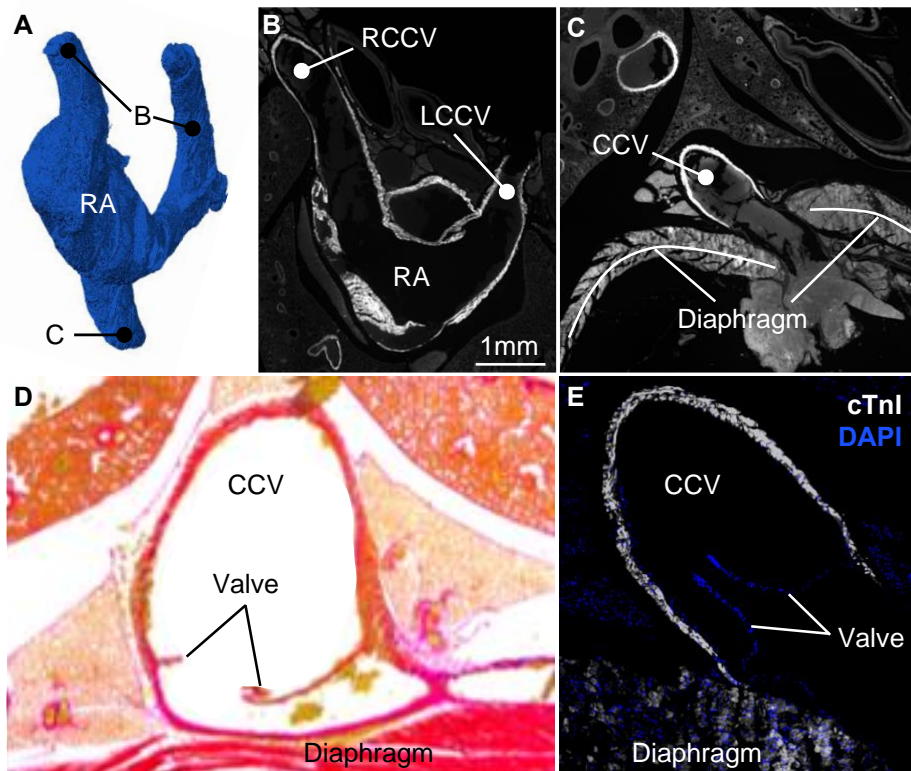

455

456 **Figure 2. Extensive myocardial sleeves of the caval veins.** **A.** Lumen cast of the right atrium  
457 (RA) and caval veins. Label B points to the approximate cranial-most extent of the myocardial  
458 sleeves which is documented in image **B**. Label C points to the caudal-most extent of the  
459 myocardial sleeves which is documented in image **C**. **B.** Detection of cTnI in the left and right  
460 cranial caval vein (LCCV and RCCV respectively). **C.** Detection of cTnI in the caudal caval  
461 vein (CCV). **D.** Venous valve at the myocardial-venous boundary in *S. minutissimus* (for the  
462 sake of presentation, blood inside the vein has been painted over with white). **E.** Venous valve  
463 at the myocardial-venous boundary in *S. minutus*.

464



Figure 3

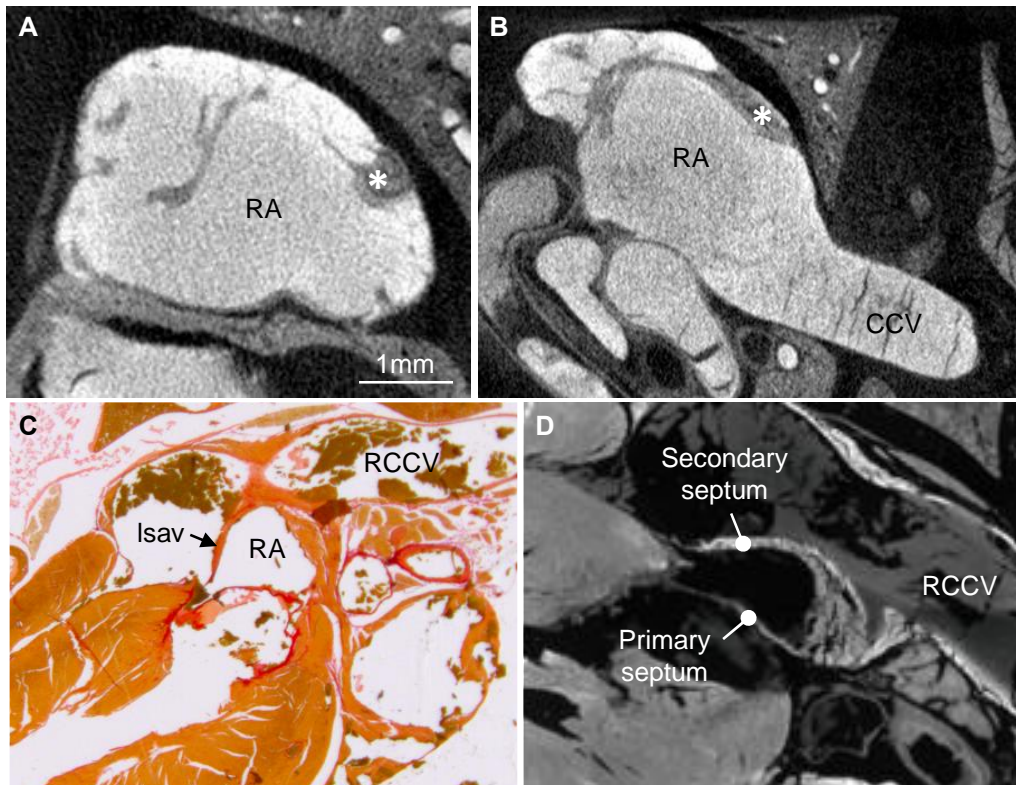

465

466 **Figure 3. Anatomy of the right atrium.** **A.** The wall of the right atrium (RA) comprise a  
467 meshwork of trabeculations, the greatest among which is crista terminalis (asterisk). **B.** There  
468 is a comparatively extensive smooth-walled part, or body. **C.** A well-developed left leaflet of  
469 the sinuatrial valve (Isav) extends from the junction of the right cranial caval vein (RCCV) to  
470 the base of the atrial septum. **D.** The atrial septum has a primary component that is thin and  
471 contains much non-myocardial tissue and a secondary component mostly of myocardium. CCV,  
472 caudal caval vein.

473

Figure 4

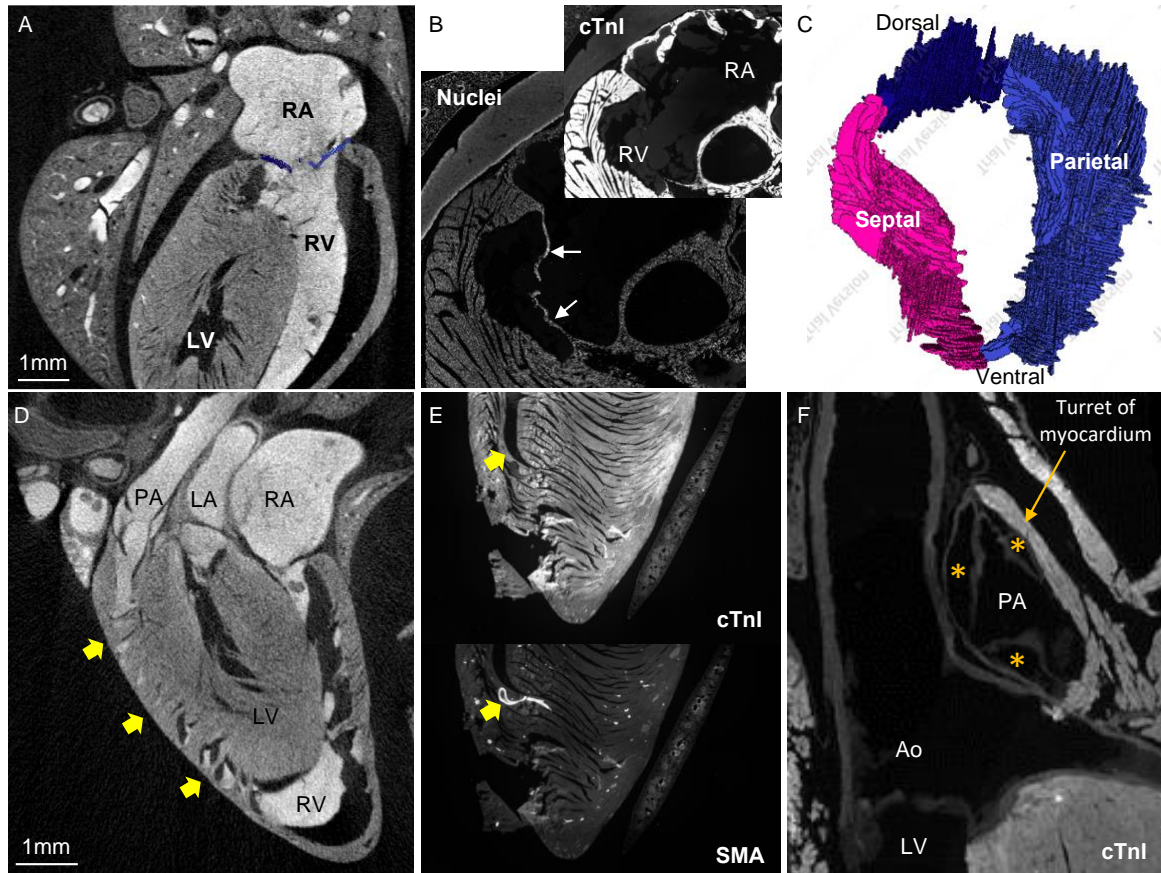

474

475 **Figure 4. Anatomy of the right ventricle.** **A.** The right ventricle (RV) wraps around the left  
476 ventricle (LV). Notice the smooth appearance of the septal surface and parietal wall, including  
477 an absence of prominent papillary muscles. **B.** The atrioventricular valve is membranous (white  
478 arrows) and without myocardium. **C.** Reconstruction of the atrioventricular valve, showing a  
479 prominent septal leaflet and a parietal leaflet that has a cleft such that it is divided into two  
480 parts. **D.** At the boundary between wall and septum are numerous trabeculations (arrows). **E.**  
481 Trabecula septo-marginalis and moderator band (arrow), within which there is a large coronary  
482 artery (its walls contain smooth muscle actin (SMA)). **F.** The valve of the pulmonary artery  
483 (PA) has three leaflets that hinge in a ‘turret’ of myocardium.

484

Figure 5

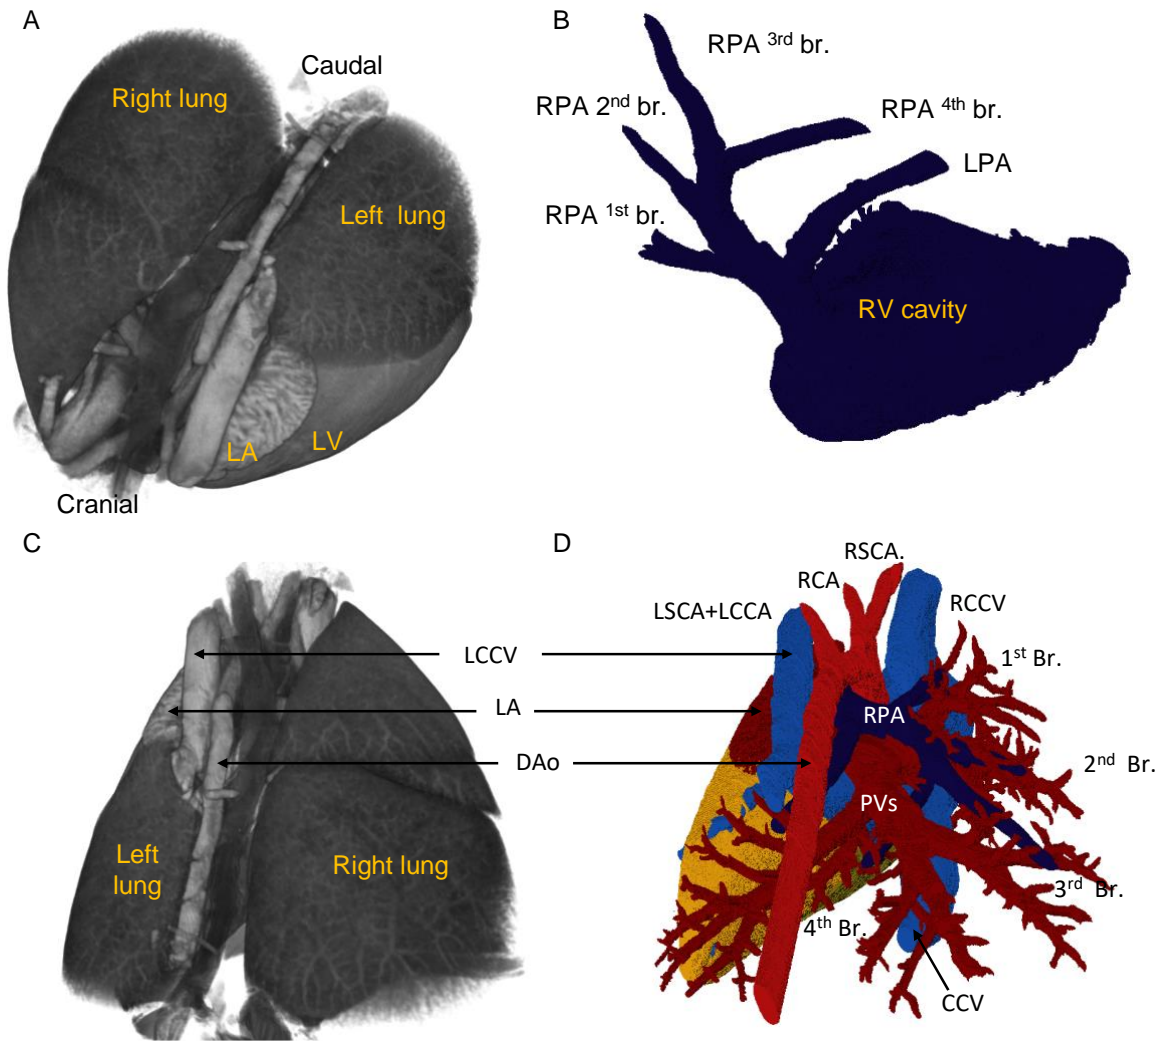

485

486 **Figure 5. The pulmonary artery.** A. Silhouette (blue) of the right ventricle and main branches

487 of the pulmonary artery unto a volume rendering, based on micro-CT, of the heart and lungs.

488 B. Virtual lumen cast of the cavity of the right ventricle (RV) and the pulmonary artery showing

489 the four main branches to the right pulmonary artery (RPA 1<sup>st</sup>-4<sup>th</sup>) and the solitary left

490 pulmonary artery (LPA). C-D. Dorsal view of the pulmonary circulation.

491

Figure 6

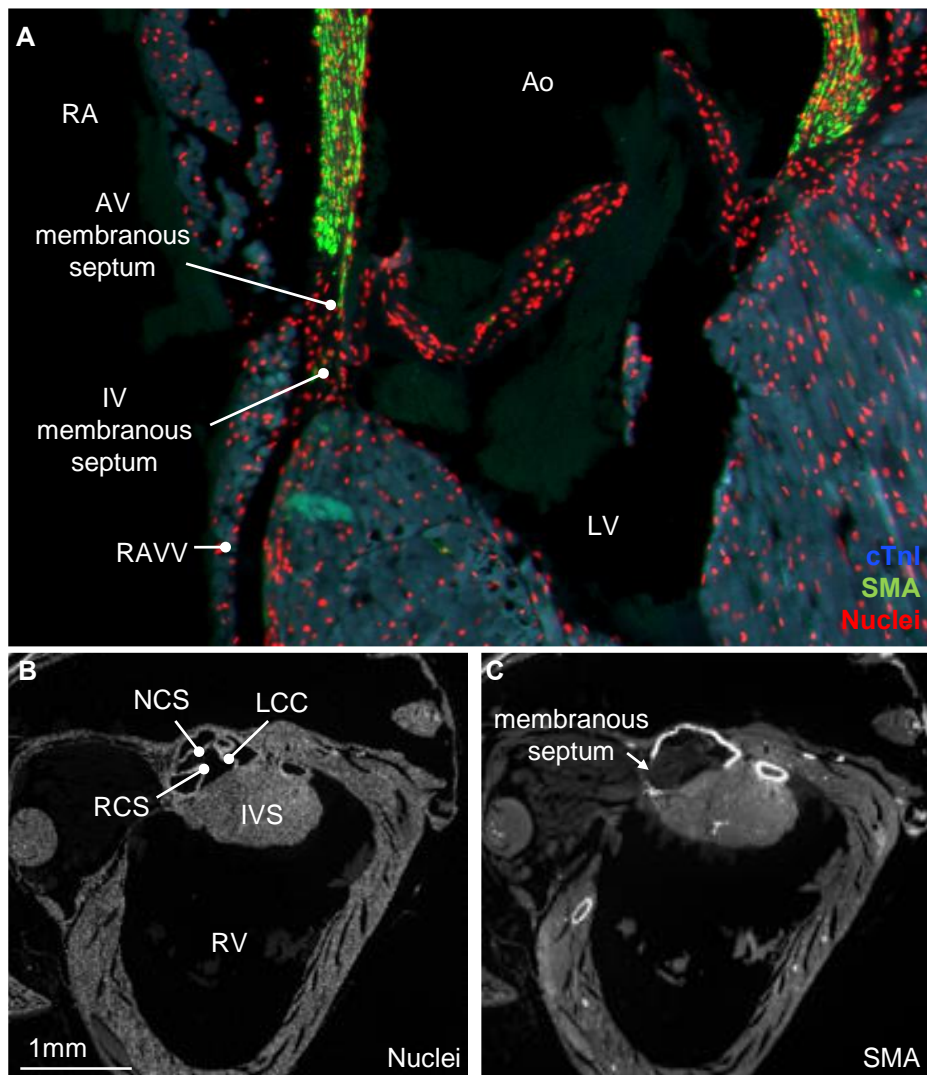

492

493 **Figure 6. The membranous septum.** A. The small membranous septum (cTnI negative)  
494 connects with the septal leaflet of the right atrioventricular valve (RAVV). Above this hinge  
495 line is the atrioventricular (AV) membranous septum and below it is the interventricular (IV)  
496 membranous septum. B-C. The atrioventricular membranous septum is below the base of the  
497 non-coronary (NCC) and right coronary cusps (RCC) of the aortic valve. Ao, aorta; LCC, left  
498 coronary cusp; LV, left ventricle; RV, right ventricle.

499

Figure 7

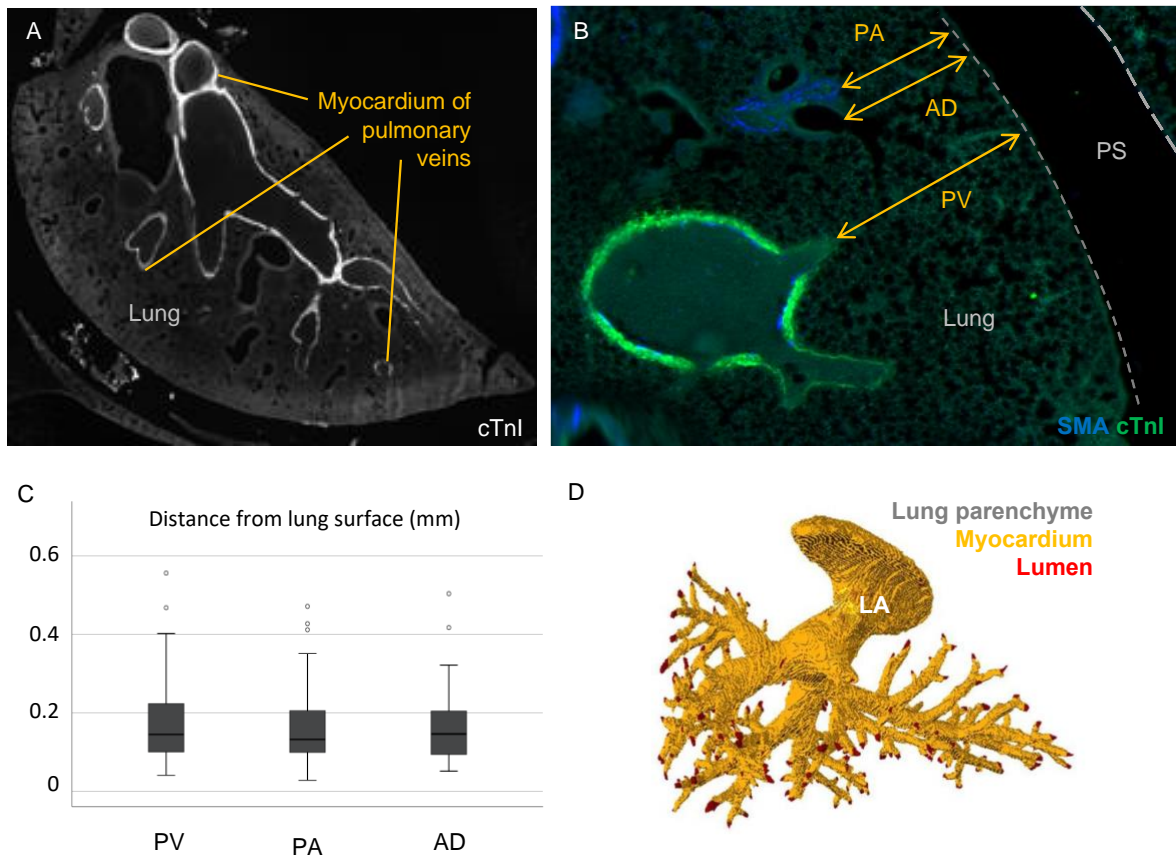

500

501 **Figure 7. Extreme extent of pulmonary venous myocardial sleeves.** A. Myocardium in the  
502 walls of the pulmonary veins reached the farthest parts of the lungs. B-C. Detailed view  
503 showing the pulmonary veins (PV), alveolar ducts (AD) and pulmonary arteries (PA) all  
504 extended to the proximity of the lung surface, and the distance of this proximity was not  
505 different on average (C, one-way ANOVA,  $p=0,573$ ; 3 specimens, 4 or 5 sections per specimen,  
506 53 measurements per structure). D. Reconstruction of the pulmonary venous lumen (red) and  
507 myocardial sleeves, illustrating that only the distal most parts of the pulmonary veins were  
508 without sleeves. PS, pleural space.

509

## Figure 8

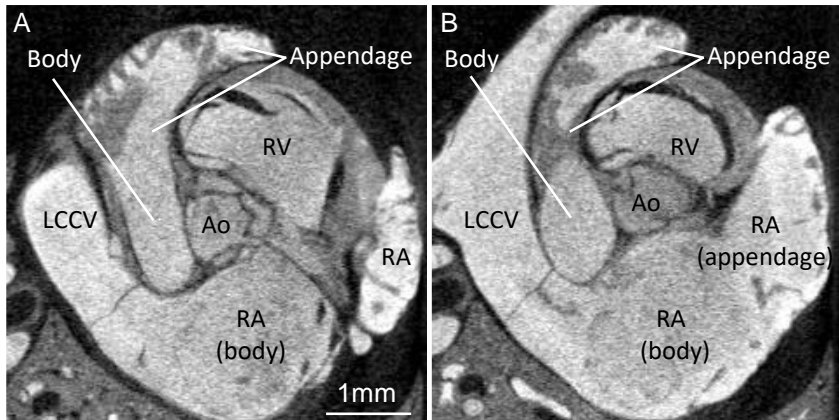

510

511 **Figure 8. The left atrium.** **A.** The left atrium has a smooth-walled body and a proportionally  
512 large trabeculated appendage. **B.** Trabeculations of the left atrium are more coarse than those  
513 of the right atrium (RA). Ao, aorta; LCCV, left cranial caval vein; RV, right ventricle.

514

Figure 9

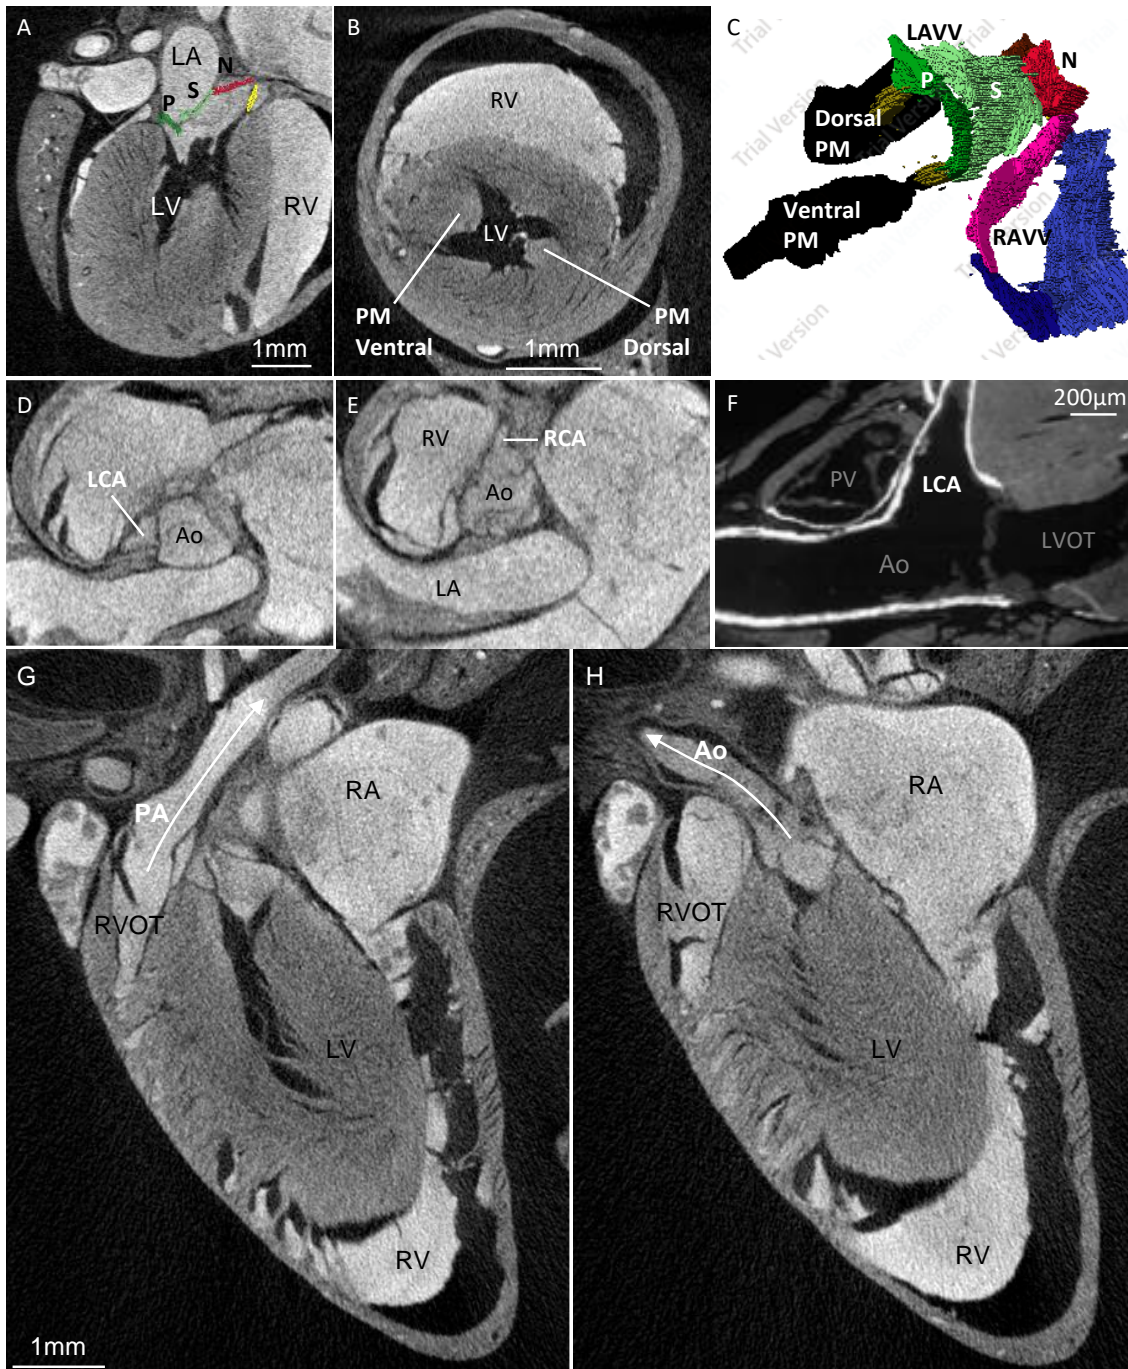

515

516 **Figure 9. The left ventricle and aorta.** **A.** The left atrioventricular valve has a parietal leaflet  
517 (P) and a septal leaflet (S) which is continuous with the aortic leaflet of the non-coronary sinus  
518 (N). **B.** There are two large papillary muscles (PM). **C.** Reconstruction of the atrioventricular  
519 valve and tension apparatus, the latter of which is much more developed from the left  
520 atrioventricular valve (LAVV) than the right atrioventricular valve (RAVV). **D-E.** Origins of

521 the left (LCA) and right coronary artery stem (RCA) within the sinuses of the aortic valve. **F.**  
522 The LCA is proportionally very large, its diameter is almost a half of the diameter of the aorta  
523 (Ao) and the base of the pulmonary arterial valve (PV). **G-H.** The aorta and the pulmonary  
524 artery are oriented at very different angles as is typical of mammals. L(R)A, left (right) atrium;  
525 L(R)VOT, left (right) ventricular outflow tract; L(R)V, left (right) ventricle.

526



Figure 10

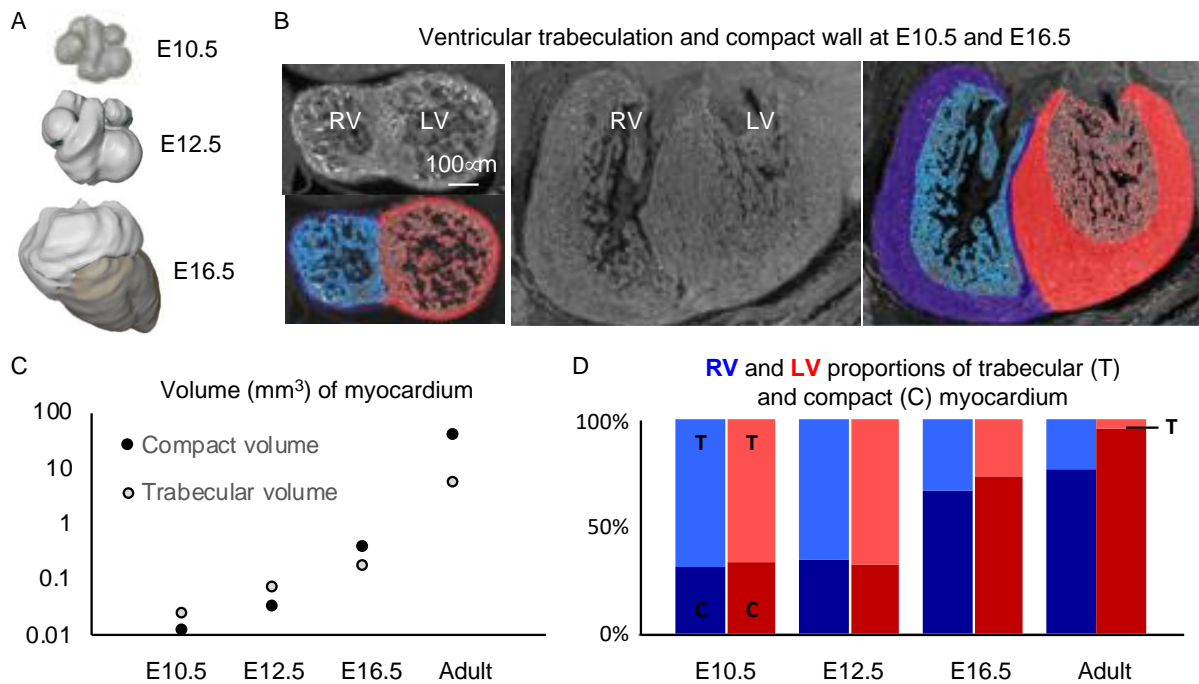

527

528 **Figure 10. Development of ventricular trabeculation.** **A.** Reconstruction based on micro-CT  
529 of a heart from each investigated embryonic age. **B.** Examples of histological sections and the  
530 subsequent labelling of these into right ventricular compact (blue) and trabecular layer (light  
531 blue) and left ventricular compact (red) and trabecular layer (light red). **C.** For each gestational  
532 age, the trabecular tissue volume increased for both ventricles, but not as fast as that of the  
533 compact tissue volume. **D.** The proportion of trabecular myocardium diminished with age and  
534 the ventricles thereby became less trabeculated even if there was no decrement in absolute  
535 volume of trabeculations.

536

Figure 11

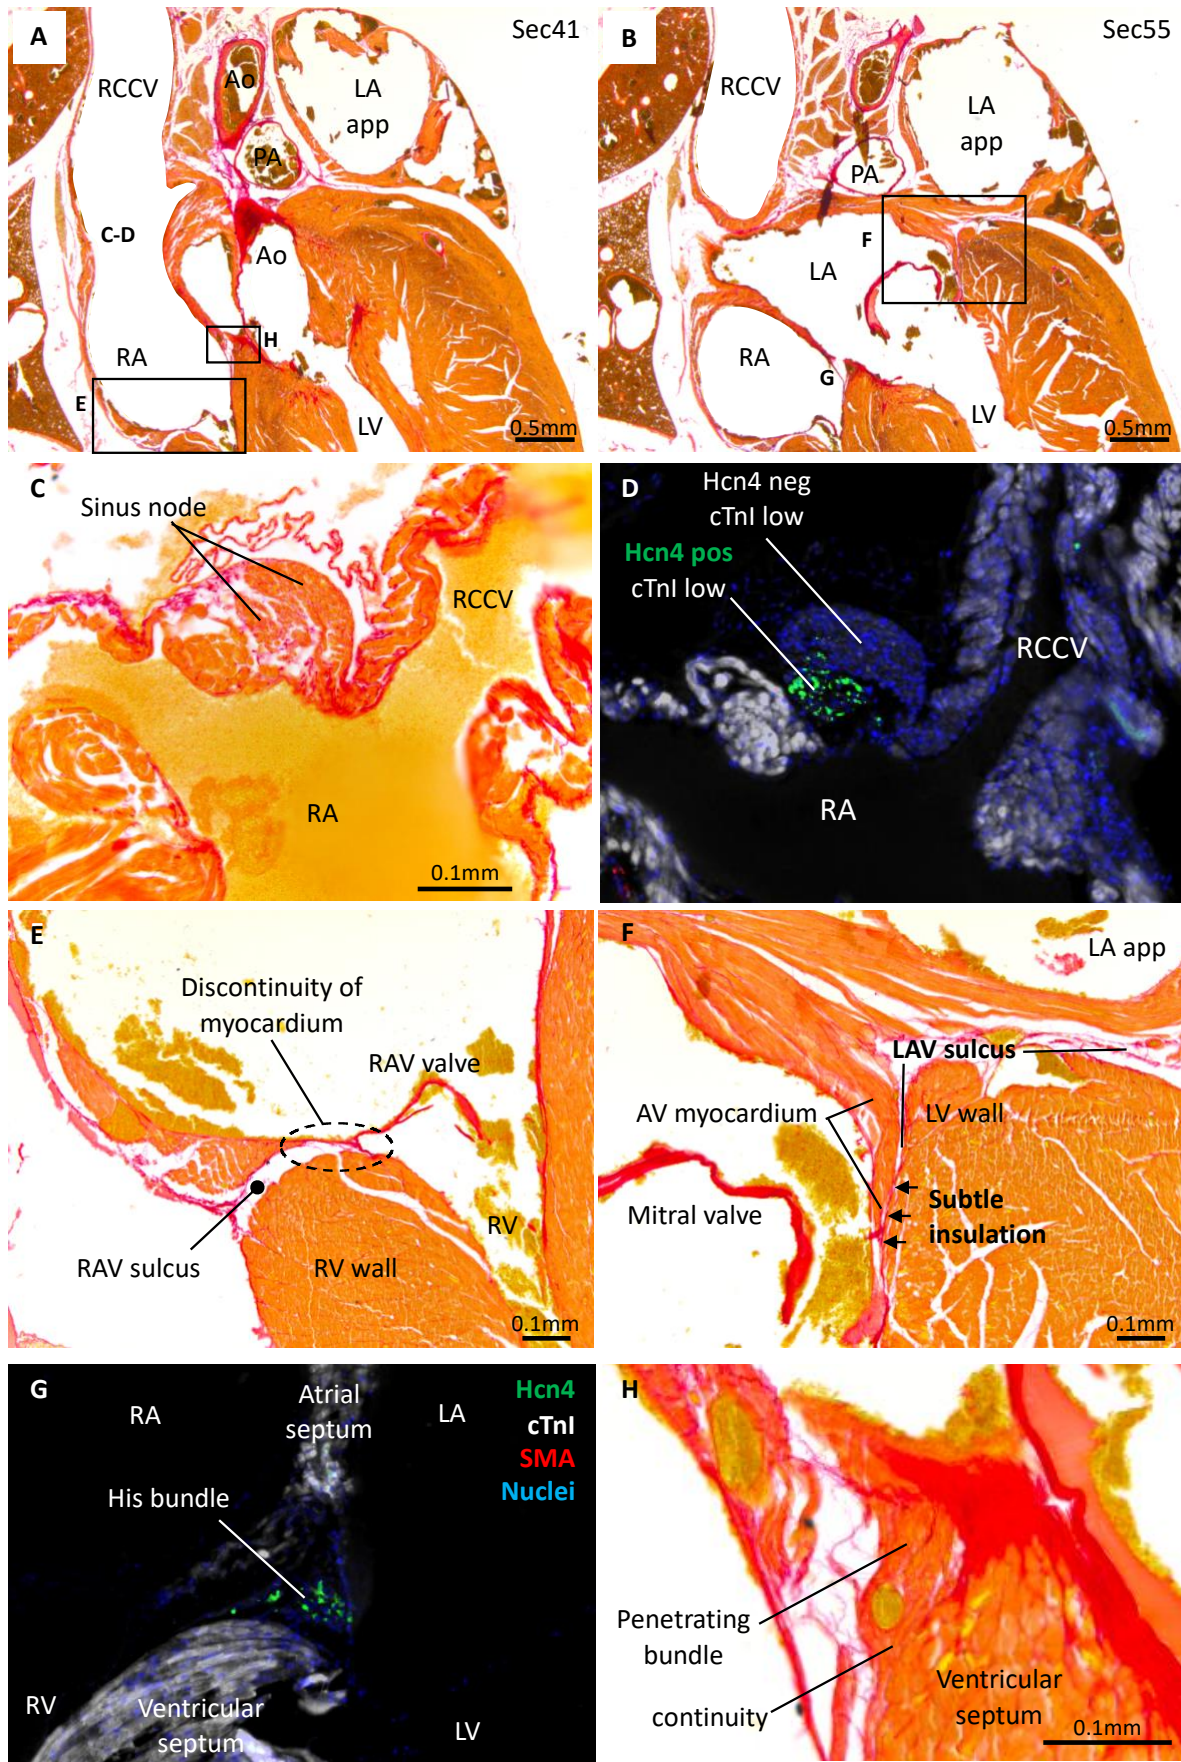

538 **Figure 11. Cardiac conduction system.** **A.** Overview of the sinuatrial (C-D) and right  
539 atrioventricular junction (E). **B.** Overview of the left atrioventricular junction (F), 280 $\mu$ m dorsal  
540 to image A. **C-D.** Sinus node on the junction of the right cranial caval vein (RCCV) and right  
541 atrium (RA), characterized by greater collagen infiltration (C) and expression of Hcn4 while  
542 having weak expression of cTnI (D). **E.** The right atrioventricular junction, showing no  
543 myocardial connection between the atrium and ventricle (RV) despite the junction contains very  
544 little tissue. **F.** The left atrioventricular junction, showing only a subtle amount of insulation  
545 between the atrioventricular (AV) and ventricular (LV) myocardium. **G.**  
546 Immunohistochemistry of the crest of the ventricular septum showing the His bundle (Hcn4  
547 expression, weak cTnI expression) localized in a position much like the one indicated with ‘G’  
548 in image B. **H.** The His bundle penetrates its insulation and becomes continuous with the  
549 ventricular septum. This image is a zoom-in of the region indicated with ‘H’ in image A. Ao,  
550 aorta; LA app, left atrial appendage; L(R)AV, left (right) atrioventricular; PA, pulmonary  
551 artery.

552

553

## References

554

- 555 ANDERSON, R. H., SPICER, D. E., BROWN, N. A. & MOHUN, T. J. 2014. The Development of Septation  
556 in the Four-Chambered Heart. *Anat Rec (Hoboken.)*, 297, 1414-1429.
- 557 BARTELS, H., BARTELS, R., BAUMANN, R., FONS, R., JURGENS, K. D. & WRIGHT, P. 1979. Blood oxygen  
558 transport and organ weights of two shrew species (*S. etruscus* and *C. russula*). *Am J Physiol*,  
559 236, R221-4.
- 560 BLAUSEN, B. E., JOHANNES, R. S. & HUTCHINS, G. M. 1990. Computer-based reconstructions of the  
561 cardiac ventricles of human embryos. *Am.J Cardiovasc Pathol.*, 3, 37-43.
- 562 BOYETT, M. R., YANNI, J., TELLEZ, J., BUCCHI, A., MESIRCA, P., CAI, X., LOGANTHA, S. J. R. J., WILSON,  
563 C., ANDERSON, C., ARIYARATNAM, J., STUART, L., NAKAO, S., ABD ALLAH, E., JONES, S.,  
564 LANCASTER, M., STEPHENSON, R., CHANDLER, N., SMITH, M., BUSSEY, C., MONFREDI, O.,  
565 MORRIS, G., BILLETER, R., MANGONI, M. E., ZHANG, H., HART, G. & D'SOUZA, A. 2021.  
566 Regulation of sinus node pacemaking and atrioventricular node conduction by HCN channels  
567 in health and disease. *Progress in Biophysics and Molecular Biology*.
- 568 CARMONA, R., ARIZA, L., CANETE, A. & MUNOZ-CHAPULI, R. 2018. Comparative developmental  
569 biology of the cardiac inflow tract. *J Mol Cell Cardiol*, 116, 155-164.
- 570 CHIN, T. K., PERLOFF, J. K., WILLIAMS, R. G., JUE, K. & MOHRMANN, R. 1990. Isolated noncompaction  
571 of left ventricular myocardium. A study of eight cases. *Circulation*, 82, 507-513.
- 572 COOK, A. C., TRAN, V. H., SPICER, D. E., ROB, J. M. H., SRIDHARAN, S., TAYLOR, A., ANDERSON, R. H. &  
573 JENSEN, B. 2017. Sequential segmental analysis of the crocodylian heart. *J Anat*.
- 574 CRICK, S. J., SHEPPARD, M. N., HO, S. Y., GEBSTEIN, L. & ANDERSON, R. H. 1998. Anatomy of the pig  
575 heart: comparisons with normal human cardiac structure. *J Anat*, 193 ( Pt 1), 105-119.
- 576 D'SILVA, A. & JENSEN, B. 2020. Left ventricular non-compaction cardiomyopathy: how many needles  
577 in the haystack? *Heart*.
- 578 DAVIES, F. 1942. The conducting system of the vertebrate heart. *Br.Heart J*, 4, 66-76.
- 579 DE BAKKER, D. M., WILKINSON, M. & JENSEN, B. 2015. Extreme variation in the atrial septation of  
580 caecilians (Amphibia: Gymnophiona). *J Anat*, 226, 1-12.
- 581 DE BOER, B. A., VAN DEN BERG, G., DE BOER, P. A., MOORMAN, A. F. & RUIJTER, J. M. 2012. Growth  
582 of the developing mouse heart: An interactive qualitative and quantitative 3D atlas. *Dev Biol.*,  
583 368, 203-213.
- 584 DEL MONTE-NIETO, G., RAMIALISON, M., ADAM, A. A. S., WU, B., AHARONOV, A., D'UVA, G.,  
585 BOURKE, L. M., PITULESCU, M. E., CHEN, H., DE LA POMPA, J. L., SHOU, W., ADAMS, R. H.,  
586 HARTEN, S. K., TZAHOR, E., ZHOU, B. & HARVEY, R. P. 2018. Control of cardiac jelly dynamics  
587 by NOTCH1 and NRG1 defines the building plan for trabeculation. *Nature*, 557, 439-445.
- 588 DOBRZYNSKI, H., ANDERSON, R. H., ATKINSON, A., BORBAS, Z., D'SOUZA, A., FRASER, J. F., INADA, S.,  
589 LOGANTHA, S. J., MONFREDI, O., MORRIS, G. M., MOORMAN, A. F., NIKOLAIDOU, T.,  
590 SCHNEIDER, H., SZUTS, V., TEMPLE, I. P., YANNI, J. & BOYETT, M. R. 2013. Structure, function  
591 and clinical relevance of the cardiac conduction system, including the atrioventricular ring  
592 and outflow tract tissues. *Pharmacol.Ther.*, 139, 260-288.
- 593 ENDO, H., MIFUNE, H., MAEDA, S., KIMURA, J., YAMADA, J., RERKAMNUAYCHOKE, W.,  
594 CHUNGSAMARNYART, N., OGAWA, K., KUROHMARU, M., HAYASHI, Y. & NISHIDA, T. 1997.  
595 Cardiac-like musculature of the intrapulmonary venous wall of the long-clawed shrew (*Sorex*  
596 *unguiculatus*), common tree shrew (*Tupaia glis*) and common marmoset (*Callithrix jacchus*).  
597 *Anat Rec*, 247, 46-52.
- 598 FABER, J., WÜST, R., DIERX, I., HUMMELINK, J., KUSTER, D., NOLLET, E., MOORMAN, A. F., SÁNCHEZ-  
599 QUINTANA, D., VAN DER WAL, A., CHRISTOFFELS, V. M. & JENSEN, B. 2021a. Differential  
600 Growth Rates, Rather Than Compaction, Determine Left Ventricular Wall Formation. *In*  
601 *Review preprint server*.

- 602 FABER, J. W., D'SILVA, A., CHRISTOFFELS, V. M. & JENSEN, B. 2021b. Lack of morphometric evidence  
603 for ventricular compaction in humans. *J Cardiol.*
- 604 FABER, J. W., HAGOORT, J., MOORMAN, A. F. M., CHRISTOFFELS, V. M. & JENSEN, B. 2021c.  
605 Quantified growth of the human embryonic heart. *Biol Open*, 10.
- 606 FRANKLIN, K. J. 1927. Valves in Veins: An Historical Survey. *Proc.R.Soc.Med.*, 21, 1-33.
- 607 HO, S. Y., MCCARTHY, K. P., ANSARI, A., THOMAS, P. S. & SÁNCHEZ-QUINTANA, D. 2003. Anatomy of  
608 the atrioventricular node and atrioventricular conduction system. *International Journal of*  
609 *Bifurcation and Chaos*, 13, 3665-3674.
- 610 JENSEN, B. 2021. The atrioventricular valve in the animal kingdom. In: WELLS, F. C. A., R.H. (ed.)  
611 *Mitral valve disease. Basic sciences and current approaches to management*. Switzerland:  
612 Springer Nature.
- 613 JENSEN, B., AGGER, P., DE BOER, B. A., OOSTRA, R. J., PEDERSEN, M., VAN DER WAL, A. C., NILS  
614 PLANKEN, R. & MOORMAN, A. F. 2016. The hypertrabeculated (noncompacted) left ventricle  
615 is different from the ventricle of embryos and ectothermic vertebrates. *Biochim Biophys*  
616 *Acta*, 1863, 1696-706.
- 617 JENSEN, B., BOUKENS, B. J., WANG, T., MOORMAN, A. F. M. & CHRISTOFFELS, V. M. 2014a. Evolution  
618 of the Sinus Venosus from Fish to Human. *Journal of Cardiovascular Development and*  
619 *Disease*, 1, 14-28.
- 620 JENSEN, B., MOORMAN, A. F. & WANG, T. 2014b. Structure and function of the hearts of lizards and  
621 snakes. *Biol.Rev.Camb.Philos.Soc.*, 89, 302-336.
- 622 JENSEN, B., VESTERSKOV, S., BOUKENS, B. J., NIELSEN, J. M., MOORMAN, A. F. M., CHRISTOFFELS, V.  
623 M. & WANG, T. 2017. Morpho-functional characterization of the systemic venous pole of the  
624 reptile heart. *Sci Rep*, 7, 6644.
- 625 JENSEN, B., WANG, T., MOORMAN A.F.M. 2019. Evolution and development of the atrial septum. *The*  
626 *Anatomical Record*, 302, 32-48.
- 627 JOYCE, W., CROSSLEY, D. A., 2ND, WANG, T. & JENSEN, B. 2020. Smooth Muscle in Cardiac Chambers  
628 is Common in Turtles and Extensive in the Emydid Turtle, *Trachemys scripta*. *Anat Rec*  
629 *(Hoboken)*, 303, 1327-1336.
- 630 JURGENS, K. D., FONS, R., PETERS, T. & SENDER, S. 1996. Heart and respiratory rates and their  
631 significance for convective oxygen transport rates in the smallest mammal, the estruscan  
632 shrew *Suncus etruscus*. *J.Exp.Biol.*, 199, 2579-2586.
- 633 KAREINEN, I., LAVONEN, E., VIRANTA-KOVANEN, S., HOLMALA, K. & LAAKKONEN, J. 2020. Anatomical  
634 variations and pathological changes in the hearts of free-ranging Eurasian lynx (*Lynx lynx*) in  
635 Finland. *European Journal of Wildlife Research*, 66, 21.
- 636 KRONEMAN, J. G. H., FABER, J. W., SCHOUTEN, J. C. M., WOLSCHRIJN, C. F., CHRISTOFFELS, V. M. &  
637 JENSEN, B. 2019. Comparative analysis of avian hearts provides little evidence for variation  
638 among species with acquired endothermy. *J Morphol.*
- 639 KULA, S., CEVIK, A., SANLI, C., PEKTAS, A., TUNAOGLU, F. S., OGUZ, A. D. & OLGUNTURK, R. 2011.  
640 Persistent left superior vena cava: experience of a tertiary health-care center. *Pediatr Int*, 53,  
641 1066-9.
- 642 LANKESTER, E. R. 1882. On the Valves of the Heart of *Ornithorhynchus paradoxus* compared with  
643 those of Man and the Rabbit, with some Observations on the Fossa Ovalis. *Proceedings of the*  
644 *Zoological Society of London*, 50, 549-559.
- 645 LILLIE, M. A., VOGL, A. W., RAVERTY, S., HAULENA, M., MCLELLAN, W. A., STENSON, G. B. &  
646 SHADWICK, R. E. 2018. The caval sphincter in cetaceans and its predicted role in controlling  
647 venous flow during a dive. *Journal of Experimental Biology*, 221.
- 648 MARAIS, C. A. & CROLE, M. R. Gross morphology of the African lion (*Panthera leo*) heart. *Acta*  
649 *Zoologica*, n/a.
- 650 MOMMERSTEEG, M. T., BROWN, N. A., PRALL, O. W., DE GIER-DE, V. C., HARVEY, R. P., MOORMAN,  
651 A. F. & CHRISTOFFELS, V. M. 2007. Pitx2c and Nkx2-5 are required for the formation and  
652 identity of the pulmonary myocardium. *Circ.Res.*, 101, 902-909.

- 653 MOOTHA, V. K., ARAI, A. E. & BALABAN, R. S. 1997. Maximum oxidative phosphorylation capacity of  
654 the mammalian heart. *Am J Physiol*, 272, H769-75.
- 655 MORRISON, P., RYSER, F. A. & DAWE, A. R. 1959. Studies on the physiology of the masked shrew  
656 *Sorex cinereus*. *Physiol.Zool.*, 32, 256-271.
- 657 NAGEL, A. 1986. The electrocardiogram of European shrews. *Comparative Biochemistry and*  
658 *Physiology Part A: Physiology*, 83, 791-794.
- 659 NATHAN, H. & GLOOBE, H. 1970. Myocardial atrio-venous junctions and extensions (sleeves) over the  
660 pulmonary and caval veins. Anatomical observations in various mammals. *Thorax*, 25, 317-  
661 324.
- 662 NOHERIA, A., DESIMONE, C. V., LACHMAN, N., EDWARDS, W. D., GAMI, A. S., MALESZEWSKI, J. J.,  
663 FRIEDMAN, P. A., MUNGER, T. M., HAMMILL, S. C., HAYES, D. L., PACKER, D. L. &  
664 ASIRVATHAM, S. J. 2013. Anatomy of the coronary sinus and epicardial coronary venous  
665 system in 620 hearts: an electrophysiology perspective. *J Cardiovasc.Electrophysiol.*, 24, 1-6.
- 666 PUCEK, Z. 1965. Seasonal and age changes in the weight of internal organs of shrews. *Acta*  
667 *Theriologica*, 10, 369-438.
- 668 RAMASWAMI, L. S. 1944. An Account of the Heart and Associated Vessels in some Genera of Apoda  
669 (Amphibia). *Proceedings of the Zoological Society of London*, 114, 117-139.
- 670 RÖSE, C. 1890. Beitrage zur vergleichenden Anatomie des Herzens der Wirbelthiere. *Morphol.Jahrb.*,  
671 16, 27-96.
- 672 ROWLATT, U. 1968. Functional morphology of the heart in mammals. *Am.Zool.*, 8, 221-229.
- 673 ROWLATT, U. 1990. Comparative Anatomy of the Heart of Mammals. *Zoological Journal Of The*  
674 *Linnean Society*, 98, 73-110.
- 675 RUNCIMAN, S. I. C., BAUDINETTE, R. V. & GANNON, B. J. 1992. The Anatomy of the Adult Marsupial  
676 Heart - an Historical Review. *Australian Journal of Zoology*, 40, 21-34.
- 677 RYCHTEROVA, V. 1971. Principle of growth in thickness of the heart ventricular wall in the chick  
678 embryo. *Folia Morphol (Praha)*, 19, 262-72.
- 679 SCHMIDT-NIELSEN, K. 1984. *Scaling: why is animal size so important?*, Cambridge university press.
- 680 SEDMERA, D., PEXIEDER, T., VUILLEMIN, M., THOMPSON, R. P. & ANDERSON, R. H. 2000.  
681 Developmental patterning of the myocardium. *Anat Rec*, 258, 319-337.
- 682 SEYMOUR, R. S. & BLAYLOCK, A. J. 2000. The principle of laplace and scaling of ventricular wall stress  
683 and blood pressure in mammals and birds. *Physiol Biochem.Zool.*, 73, 389-405.
- 684 SIZAROV, A., DEVALLA, H. D., ANDERSON, R. H., PASSIER, R., CHRISTOFFELS, V. M. & MOORMAN, A. F.  
685 2011. Molecular Analysis of the Patterning of the Conduction Tissues in the Developing  
686 Human Heart. *Circ.Arrhythm.Electrophysiol.*, 4, 532-542.
- 687 VORNANEN, M. 1989. Basic functional properties of the cardiac muscle of the common shrew (*Sorex*  
688 *araneus*) and some other small mammals. *J.Exp.Biol.*, 145, 339-351.
- 689 VORNANEN, M. 1992. Maximum heart rate of soricine shrews: correlation with contractile properties  
690 and myosin composition. *Am.J.Physiol.*, 31(5), R842-R851.
- 691 YASUI, K. 1992. Embryonic development of the house shrew (*Suncus murinus*). I. Embryos at stages 9  
692 and 10 with 1 to 12 pairs of somites. *Anat Embryol (Berl)*, 186, 49-65.
- 693 YASUI, K. 1993. Embryonic development of the house shrew (*Suncus murinus*). II. Embryos at stages  
694 11 and 12 with 13 to 29 pairs of somites, showing limb bud formation and closed cephalic  
695 neural tube. *Anat Embryol (Berl)*, 187, 45-65.

696
